# 1 Behavioral and structural barriers to human 2 post-exposure prophylaxis and other preventive 3 practices during a canine rabies epidemic.

4 Ricardo Castillo-Neyra <sup>1,2\*</sup>, Alison M. Buttenheim <sup>2,3</sup>, Joanna Brown <sup>2</sup>, James F.  
5 Ferrara <sup>4</sup>, Claudia Arevalo-Nieto <sup>2</sup>, Katty Borrini-Mayorí <sup>2</sup>, Michael Z. Levy <sup>1,2</sup>,  
6 Victor Becerra <sup>5</sup>, and Valerie A. Paz-Soldan <sup>2,6</sup>

7 <sup>1</sup> Department of Biostatistics, Epidemiology & Informatics, Perelman School of Medicine at University of  
8 Pennsylvania, Philadelphia, Pennsylvania, United States of America;

9 <sup>2</sup> Zoonotic Disease Research Lab, One Health Unit, School of Public Health and Administration, Universidad  
10 Peruana Cayetano Heredia, Lima, Peru;

11 <sup>3</sup> Department of Family and Community Health, University of Pennsylvania School of Nursing, Philadelphia,  
12 Pennsylvania, United States of America;

13 <sup>4</sup> School of Veterinary Medicine, University of Pennsylvania, Pennsylvania, United States of America;

14 <sup>5</sup> Microred Mariano Melgar, Ministerio de Salud, Arequipa, Peru;

15 <sup>6</sup> Department of Global Community Health and Behavioral Sciences, Tulane University School of Public  
16 Health and Tropical Medicine, New Orleans, Louisiana, United States.

17  
18 RCN: [cricardo@upenn.edu](mailto:cricardo@upenn.edu)

19 AMB: [abutt@nursing.upenn.edu](mailto:abutt@nursing.upenn.edu)

20 JBr: [joannabrown84@gmail.com](mailto:joannabrown84@gmail.com)

21 JFF: [jafe@vet.upenn.edu](mailto:jafe@vet.upenn.edu)

22 CA: [arenica2@gmail.com](mailto:arenica2@gmail.com)

23 KB: [yttakbm@gmail.com](mailto:yttakbm@gmail.com)

24 MZL: [mzlevy@upenn.edu](mailto:mzlevy@upenn.edu)

25 VB: [bizk077@hotmail.com](mailto:bizk077@hotmail.com)

26 VAPS: [vpazsold@tulane.edu](mailto:vpazsold@tulane.edu)

27  
28 \* Correspondence: [cricardo@upenn.edu](mailto:cricardo@upenn.edu); Tel.: +1-215-746-7333

29 **Abstract:** A canine rabies epidemic started in early 2015 in Arequipa, Peru; the  
30 rabies virus continues to circulate in the dog population. Some city residents who  
31 suffer dog bites do not seek care or do not complete indicated post-exposure  
32 prophylaxis (PEP) regimens, increasing the risk of human rabies. The objectives of  
33 our study were to qualitatively assess knowledge about rabies, and preventive  
34 practices, such as PEP vaccination, following a dog bite. We conducted eight focus  
35 group discussions in peri-urban and urban communities with 70 total participants.  
36 We observed low awareness of rabies severity and fatality. Participants, especially  
37 those in per-urban communities, recounted applying herbs or the hair of the dog  
38 that bit them to wounds rather than seeking appropriate care. Misconceptions  
39 about rabies vaccines and mistreatment at health centers also commonly prevents  
40 initiating or completing PEP vaccination. We identify important behavioral and  
41 structural barriers and knowledge gaps that limit evidence-based preventive  
42 strategies against rabies and may threaten successful prevention of dog-mediated  
43 human rabies in this setting.

44 **Keywords:** Focus groups; human rabies, post-exposure prophylaxis; qualitative  
45 research; rabies outbreak; urban rabies; zoonosis.

46

---

47 **Introduction**

48 The city of Arequipa, Peru has been in the midst of a canine rabies epidemic  
49 for the past five years (1,2). Fortunately, no human cases have yet been detected.  
50 However, continued transmission of the rabies virus in the dog population puts the  
51 one million inhabitants of the city at risk of infection. The Peruvian Ministry of  
52 Health (MOH) has taken steps since the beginning of the outbreak to prevent  
53 human transmission. They have conducted mass dog vaccination campaigns,  
54 coordinated health promotion campaigns, and provided, at no cost, post-exposure  
55 prophylaxis (PEP) vaccination based on cell-derived vaccines (3) to people exposed  
56 or potentially exposed to the rabies virus. However, health posts report that some  
57 exposed residents do not seek professional care for bites or follow the PEP  
58 vaccination regimen to completion, thereby increasing the risk of human rabies in  
59 Arequipa. In one of the 14 districts in the city, up to 14% of residents reported being  
60 bitten by a dog of unknown vaccination status during the first year of the outbreak;  
61 of these, only 22% sought medical care (unpublished). We do not know how many  
62 residents bitten by a dog start the PEP regimen but do not complete it; healthcare  
63 providers and authorities from the region contacted us concerned over incomplete  
64 PEP regimens and wanting to understand more about possible reasons for not  
65 adhering to the five shot sequence.

66 Rabies has the highest case-fatality ratio of any infectious disease (4); once  
67 the disease manifests clinically, the outcome is almost invariably fatal (5,6).  
68 However, human rabies is preventable through a well-characterized protocol,  
69 including thorough washing of all wounds with soap and copious amounts of  
70 water, prompt initiation and completion of PEP, and administration of rabies  
71 immunoglobulin if indicated and available (7-9). The PEP regimen varies based on  
72 the type of vaccine; in Peru, the vaccine regimen during the development of this  
73 study consisted of 5 intramuscular shots given at days 0, 3, 7, 14, and 28 and was  
74 provided for free by the Ministry of Health (10).

75 Despite high fatality and effective prophylaxis, people do not always seek  
76 medical care following a bite. Those that do initiate PEP swiftly often do not  
77 complete it (11,12). Various factors contribute to limited or delayed treatment  
78 seeking, including the lack of perceived need for immediate treatment after  
79 exposure (13), preference for traditional medicine, giving priority to earning a  
80 livelihood over seeking care (14), and increasingly, vaccine hesitancy (15,16). Some  
81 report that rabies vaccine injections are painful and difficult to tolerate (17); parents  
82 report desperation when they see their kids in pain because of a vaccine (15). In  
83 some settings (although not in Peru), rabies vaccines are expensive, creating a social  
84 justice issue for bite victims and their communities who are often least able to afford  
85 care and most vulnerable to rabies mortality (18). Unfortunately, despite aggressive  
86 and successful dog vaccination programs (19) and widely-available human  
87 post-exposure prophylaxis, 59,000 humans die of rabies every year (20).

88 The plentiful literature on rabies transmission and PEP compliance highlights  
89 gaps in rabies knowledge and in seeking medical treatment, including PEP,  
90 especially when urgently indicated (1,2,6-8,20-23). Most studies show that  
91 respondents recognize the dog as a primary reservoir for rabies transmission and  
92 that the majority of respondents agree that rabies can be transmitted by a dog bite,  
93 but fewer individuals recognize that transmission is through the dog's saliva  
94 (1,2,4,5,7,8,19,20). Some studies have identified poorer knowledge of rabies in urban  
95 vs. non-urban populations (5,19,20). Individual factors associated with poorer  
96 rabies knowledge include being single, having more children, lower educational  
97 attainment, having a sedentary lifestyle, and being younger (5,19,20). Variable  
98 knowledge of the importance of using soap and water for bite wounds has been  
99 reported. Around half the population surveyed in Western India was aware of the  
100 importance of washing a wound, compared to a very small percentage of those  
101 surveyed in Tanzania (6,7,19,20). A majority of those surveyed who used alternative  
102 medicine, such as turmeric powder in India, had a delayed hospital presentation (>  
103 24 hours) (14,24). That said, increasing knowledge about rabies and its prevention is  
104 likely necessary but not sufficient for behavior change (1,2,6-8,20).

105 In general, rabies mortality has been associated with inadequate wound  
106 management, delayed arrival to the healthcare services, and misconceptions about  
107 animal bites (14), and these associations are more prevalent in non-urban areas  
108 compared to urban ones (13,14,17,24-28). The likelihood of seeking care for a bite or  
109 receiving a PEP recommendation depended on factors including: which animal  
110 (dog vs. cat) bit the person; whether the biting animal was owned (vs. unowned),  
111 whether the person knew the vaccination status of the biting animal, and the rabies  
112 and PEP knowledge of the medical provider (1,2,4). If the bite was from a dog,  
113 especially if unowned or unvaccinated (4), PEP was more likely to be requested  
114 and/or recommended. In survey-based studies, while the majority of respondents  
115 knew the mortality risk of rabies (1,2,7,19-21), only a minority of those who  
116 identified as bite victims actually sought out a full rabies vaccination series (2,21).  
117 Significant individual-level characteristics associated with lack of PEP knowledge  
118 and practices included no formal education, owning only one dog, and living far  
119 from a vaccination site (e.g. health facility) (6,7).

120 In a city with a re-emergent epidemic of canine rabies where low uptake and  
121 low completion of PEP vaccination is reported by health practitioners, the  
122 objectives of this study were to: 1) qualitatively assess people's knowledge and  
123 practices following any dog bite, 2) characterize differences in prevention  
124 perceptions and strategies by levels of urbanization, and 3) examine community  
125 attitudes towards PEP vaccination, and 4) potential behavioral and structural  
126 barriers to initiating and completing PEP. Focus groups were conducted in urban  
127 and peri-urban communities, and during the analysis, the results were stratified by  
128 these two groups to examine potential differences in their prevention perceptions  
129 and strategies. Findings from this study can improve the framing and content of

130 health communication campaigns to increase appropriate health-care seeking  
131 practices, with a focus on seeking and completing PEP.

## 132 **2. Materials and Methods**

### 133 **2.1. Ethics statement**

134 This study was approved by the Institutional Review Boards from Universidad  
135 Peruana Cayetano Heredia (approval identification number: 65369), Tulane  
136 University (#14-606720), and University of Pennsylvania (#823736).

137

### 138 **2.2. Study settings and study population**

139 This study was conducted in the Mariano Melgar (MM) district of Arequipa.  
140 The city of Arequipa—the second largest in Peru—has a population of 969,000 and  
141 is situated ~2300 meters above sea level (29). MM has 14,500 households and like  
142 many districts in Arequipa, has experienced heterogeneous growth and urban  
143 development, related to significant unplanned immigration to this city over several  
144 decades. Half of the rabid dogs detected in Arequipa have been detected in MM.

145 Participants in our study came from both urban and peri-urban areas of MM.  
146 Urban neighborhoods were founded several decades (in some cases, centuries) ago,  
147 and tend to have wealthier and more highly-educated residents compared to those  
148 in the peri-urban areas. Homes tend to be more secure due to better construction  
149 materials in the urban areas compared to those in the peri-urban areas. Peri-urban  
150 neighborhoods, founded just 10-50 years ago during a time of mass rural to urban  
151 migration in Peru, tend to have housing made from cheap and often temporary  
152 materials, fewer community resources, and more security problems (2).

153

154 Figure 1. (New photos of urban and peri-urban areas)

155

### 156 **2.3. Study Design**

157 Data for this qualitative study were obtained through focus group discussions  
158 (FGD). The research team developed and applied a focus group guide aimed at  
159 examining the following topics: 1) knowledge of rabies virus transmission in dogs  
160 and humans, 2) knowledge of signs of canine rabies, 3) knowledge of and practices  
161 associated to management of dog bite wounds, and 4) knowledge about and  
162 awareness of post-exposure prophylaxis (PEP), and the importance of its  
163 completion. Additional topics in the interview guide included dog vaccination and  
164 dog ownership; these were analyzed separately and results described elsewhere (2).

165 Three Peruvian facilitators conducted the FGD: VPS, a social scientist, PhD in  
166 public health and experienced focus group facilitator; JBr, BA in psychology and  
167 research assistant; and RCN, infectious disease scientist, veterinarian and PhD in  
168 epidemiology who leads the study in Arequipa. Another team member from  
169 Arequipa took extensive notes. All FGD were carried out in January 2016. After  
170 each focus group, a 15-minute conversation was held with the participants to  
171 answer questions and eliminate misconceptions about rabies. If any of the FGD

172 participants reported taking actions that would warrant medical care we would  
173 refer to the health center for same-day medical advice.

174

#### 175 **2.4. Sampling strategy**

176 Participants for the eight FGD were recruited from urban and peri-urban  
177 neighborhoods of MM through purposive sampling. Participants in households  
178 close to health facilities and the district municipal office building are often more  
179 exposed to rabies vaccination campaign messages or general health promotion  
180 information. Therefore, participants were recruited from households at least 6  
181 blocks away from these sites by pre-selecting blocks on a map.

182

#### 183 **2.5. Recruitment approach**

184 Recruitment was done by visiting every third house door-to-door in the  
185 pre-selected blocks the day before the FGD to recruit 2 or 3 participants per block  
186 willing to participate and who met the inclusion criteria. The total number of  
187 desired participants per FGD (8 to 12) was reached applying the same procedure in  
188 adjacent blocks, although given that the turnout might be low, up to 15 participants  
189 were invited. While picking up participants by hired van 15 minutes prior to the  
190 FGD, the field team reviewed the informed consent forms with participants to  
191 ensure their interest in participating. Participants were picked up from their  
192 households with hired transportation 10 to 15 minutes before the FGD and were  
193 compensated for their transport home. We recruited a diverse sample (by gender,  
194 adult age group, and dog ownership status), ensuring diversity of perceptions and  
195 experiences. Prior to starting the FGD, the research team once again reviewed the  
196 informed consent with the participants and obtained written consent from each to  
197 participate for audio recording.

198

#### 199 **2.6. Data management and analysis**

200 Digital audio recordings and written notes from the eight FGDs were  
201 transcribed verbatim. An inductive coding approach was applied to identify topics  
202 that emerged from the data (30). Codes were generated and organized based on  
203 emergent and *a priori* themes of interest related to behavioral and structural barriers  
204 to PEP and other prevention strategies. Coding was done by three authors (JBr,  
205 CAN, KBM) using ATLAS.ti (31) software. Inconsistent coding was flagged,  
206 discussed, and resolved, returning to transcripts when necessary. The analysis of  
207 the principal topics of interest was stratified by urban and peri-urban communities,  
208 but only mentioned in text when we found differences. All de-identified data are  
209 available at [https://github.com/chirimacha/Rabies\\_PEP\\_Arequipa\\_qualitative](https://github.com/chirimacha/Rabies_PEP_Arequipa_qualitative).

### 210 **3. Results**

211 The number of participants per focus group ranged from 7 to 11, with a total N  
212 of 70. Participants were predominantly female (77%) and dog owners (91%). Most  
213 participants from the urban communities were born in the city of Arequipa (75%)  
214 versus participants from peri-urban who were mostly born in the countryside of

215 Arequipa or in other Peruvian states (63%). Half of all participants were  
216 housewives or reported working at home, 36% reported working out of the house  
217 in jobs spanning from law firms to farms, 8% were students, and 6% were  
218 unemployed or did not disclose their occupation.

219

### 220 **3.1. Knowledge of rabies virus transmission in dogs and humans**

221 When asked how dogs become infected with rabies, “dog bites” were identified  
222 by most in both the urban and peri-urban areas. However, participants also  
223 reported that rabies could be lingering in the environment, and that certain  
224 conditions—specifically heat, overexposure to sun, and lack of water for the  
225 dog—could lead to dogs acquiring rabies:

226 *“It is my understanding that rabies occurs because the dog is too much in the sun, and*  
227 *that happens more when the dog is on the street, less when it’s at home.” (Female,*  
228 *peri-urban area)*

229 Participants in both areas also mentioned that flies or rats can infect dogs, possibly  
230 by direct contact with an open wound. Parasites, poor diet, the stress and  
231 frustration of being tied up, and isolation or lack of contact with people were also  
232 cited as risk factors for rabies:

233 *“The dog wants to talk but it can’t, so there’s impotence; I imagine it’s stressed. Poor*  
234 *dog. And that’s why they produce rabies.” (Female, urban area)*

235 Although most participants correctly recognized bites from dogs as the main  
236 source of transmission to humans, none mentioned dog scratches as possible  
237 transmission mechanisms. One urban resident specifically expressed doubts about  
238 saliva playing a role in transmission.

239 FGD participants also differentiated risk of rabies transmission by the dog’s  
240 ownership status (owned vs. stray). There was a common perception that stray  
241 dogs are at particular risk of carrying rabies because they are not vaccinated, enter  
242 easily into fights, are dirty, and often carry other diseases such as scabies. This led  
243 to speculation about whether it is necessary to vaccinate dogs that are not let out of  
244 the home:

245 *“... if my dog is in the house all day, how will it have rabies if it doesn’t get together with*  
246 *stray dogs? My dog is not from the street, it’s only in the house, it’s domestic. So...  
247 maybe I won’t give [worrying about whether her dog may get rabies] much importance.”*  
248 *(Female, peri-urban area).*

249 FGD participants from both areas suggested there should be more information  
250 about human rabies on television, including people’s testimonies, to improve  
251 dissemination about disease prevention.

252

### 253 **3.2. Knowledge of signs and symptoms of canine rabies**

254 Participants in both study areas correctly described the most widely-recognized  
255 symptoms of canine rabies: dog aggressiveness, excessive drooling or foam from  
256 the dog’s mouth, and a change in the dog’s behavior. Some participants could  
257 describe less well-known symptoms: bright, red, wide-open eyes; staggering;  
258 disorientation; and hydrophobia or unwillingness to drink water. No participants

259 recounted the paralytic or dumb form of rabies (in which rabid dogs exhibit  
260 progressive limb weakness and inability to swallow, with people frequently  
261 presuming dogs have something stuck in their mouths). Participants' knowledge  
262 about what a rabid dog looked like seemed to affect their treatment seeking  
263 decision-making for a dog bite if the dog seemed well:

264 *"Because I see there's nothing wrong with my neighbor's dog, so it is not worth going*  
265 *(to get treated) and because it takes time. What for, if the dog is fine? [If the dog shows*  
266 *rabies signs later], then yes."* (Man, peri-urban area, owner)

267 Participants could correctly describe that, following infection with the rabies  
268 virus, one might not have any symptoms for days or weeks. While almost all  
269 participants thought incorrectly that canine rabies can be easily diagnosed with a  
270 simple blood test, only two—from the urban area—mentioned that rabies attacks  
271 the dog's nervous system and that it is necessary to analyze the dog's brain to  
272 confirm disease. Urban residents indicated that they might only seek treatment if  
273 signs of infection or other symptoms possibly related to a dog bite or to rabies  
274 emerged— focusing on bites with significant soft-tissue damage, but not worrying  
275 about small skin-breaking bites.

276

### 277 **3.3. Knowledge of and barriers to management of dog bite wounds**

278 FGD participants recognized dog bites as a mode of transmission of rabies virus  
279 to humans, and could identify the three key preventive steps that are posted in  
280 most area health facilities (Figure 2): 1) wash the wound with water and soap; 2)  
281 identify the dog; and 3) seek medical care and report the offending dog at the  
282 nearest health post/health center. Participants identified health communication  
283 material (Figure 3) as the source of this knowledge.

284 Despite knowing what to do, most respondents reported not taking action  
285 themselves or knowing people who had not sought care or reported a dog  
286 following a bite. The most common stated reasons for not seeking care were: 1) lack  
287 of awareness that a small bite or skin tear require care, 2) poor treatment at the  
288 health post or health center, 3) logistical and economic barriers to seeking care, 4)  
289 use of alternative treatments, and 5) perception that a "known" or "good" dog is  
290 "safe".

291 Respondents agreed that few people would seek care for a minor scratch or bite  
292 unless there was significant pain, bruising, bleeding, broken tissue, or the wound  
293 failed to heal on its own:

294 *"When the wound bleeds too much, when it doesn't heal and when it's way too serious -*  
295 *that's when you go. When it's a small bite, people leave it; they cure it with alcohol and*  
296 *leave it."* (Woman, peri-urban area)

297 Respondents did not draw a connection from waiting to see if the wound healed on  
298 its own and delayed treatment.

299 Perceptions about and experiences of poor quality care was another barrier to  
300 seeking care following a bite. Most respondents live near a health post (health  
301 centers and hospitals are further away), but had more negative opinions about the  
302 posts, particularly the limited hours these are open, the poor customer service, and

303 the stock-outs of the rabies vaccine (which our team confirmed at a nearby health  
304 facility following the FGD):

305 *"They mistreat us, don't attend to us... [Those doctors say] 'oh, there's no pills here'.  
306 From the post they send us down to the health center, and there they ask us 'Why were  
307 you sent here? They have doctors up there, the health post has this and that...'"*  
308 *(Woman, peri-urban area)*

309 Logistical and economic reasons (i.e., distance to health facility, lack of time,  
310 and perceived cost) also prevented respondents from seeking care in a health  
311 facility after a dog bite, primarily in the peri-urban area. Participants noted that  
312 going to the health post involves hours or even a whole working day, which was  
313 not considered feasible, particularly when a dog bite is considered treatable at  
314 home:

315 *"It's a waste of time going to the health post when we can treat it, based on our  
316 experience, with soap, hydrogen peroxide.... and it's cured!" (Woman, urban area).*

317 Some male participants explained that they could not waste work time seeking  
318 medical care in the health posts (this comment from a peri-urban male elicited  
319 several nods from other men in the group):

320 *"I wouldn't go because I have debts, I have to work and the post is often full so there's no  
321 time, you waste time—one, two, three hours—hours that you lose of work, so I prefer not  
322 to go. You don't really get a sense of being at risk or not."*

323 Participants revealed a preference for alternative treatments for dog bites that  
324 also reduced likelihood of going to the health post for care. In urban areas people  
325 mentioned other remedies such as soap, hydrogen peroxide, penicillin or  
326 Mentholatum. People in the peri-urban areas were more likely to mention  
327 alternatives associated with local popular healing practices, such as aloe vera and  
328 herbs, and even burnt dog hair:

329 *Woman: When I was little a dog bit me on the leg and made a deep wound. The owner cut  
330 the dog's hair, burnt it and put it on the sore with a patch. It scarred well.*

331 *Man: That's a grandmother's secret. (Peri-urban area)*

332 Older adults were reported as being more likely to use local healing  
333 practices—ranging from Mentholatum to herbs to hair ashes—and more reticent to  
334 seek care at a health facility than younger people.

335 Finally, there was also the perception—in both urban and peri-urban  
336 areas—that seeking care for a dog bite depended on the specific dog. When probed  
337 during the FGDs, peri-urban residents were more likely than urban residents to  
338 report having ever been bitten and having been bitten in the past year (some  
339 reported three or four bites in the past year); they were also more likely to report  
340 not seeking care following a bite. If the biting dog was their own animal or if the  
341 owner was known to care for the dog, participants who had been bitten were less  
342 likely to seek care. If they did not know the dog's owner, they perceived a higher  
343 chance of acquiring diseases, including rabies. The dog's behavior also influenced  
344 their assessment of rabies risk and subsequent response to a dog bite. If the biting  
345 dog was "fierce" ("*perro bravo*") or showed aggressive behavior, even if the wound  
346 was small, and the dog had an owner, they were more likely to go to the health post



347 than if it was a less aggressive dog. A woman in the peri-urban FGD mentioned that  
348 her once-gentle dog suddenly became aggressive, but she did not relate the  
349 behavior change to rabies, nor the need to seek treatment for the scratches:

350 *Woman: ... and (the dog) started biting my husband. One day she was in my room*  
351 *acting crazy, started to bite and bark (...) I was watching TV, I hadn't done anything to*  
352 *her, she was irritated (...) and she started biting at me "woof woof woof". She bit me and*  
353 *I hit her head with my TV thinking she would run away but she didn't and kept biting*  
354 *me. [It occurred] a month ago I think. My husband had to kill her because she got like*  
355 *that.*

356 *Facilitator: Where did she bite you?*

357 *Woman: On the leg, but it was just a scratch, she didn't do anything to me.*

358 *Facilitator: Was there any blood?*

359 *Woman: Yes (...)*

360 *Facilitator: Did you go to the health post?*

361 *Woman: No, I washed it with boiled water and soap.\**

362

### 363 **3.4. Knowledge about and practices associated with post-exposure prophylaxis** 364 **(PEP) and the importance of its completion**

365 When asked about barriers to accepting PEP or completing PEP once started,  
366 participants identified six reasons: 1) rabies vaccines are too painful, 2) people  
367 thinking that multiple vaccines could be harmful, 3) people feeling that one or two  
368 vaccines are enough, 4) people not wanting to complete the series of vaccines  
369 because they are not treated well at health facilities or by health personnel, 5)  
370 people not having appropriate information about the importance of completing  
371 PEP, and 6) lack of time to continue with the PEP regime. Participants from the  
372 urban areas emphasized the first, second, and third responses, while those from  
373 peri-urban areas were more likely to mention the fourth, fifth, and sixth reasons.

374 Participants reported that the rabies vaccine has a particular reputation for  
375 being painful. FGD participants in the urban area specifically (and a few in the  
376 peri-urban area) conjectured that people might avoid the rabies vaccine for that  
377 reason. Poor skills in administering the vaccine was raised as a cause of pain.  
378 Estimates of the number of doses of the vaccine required for prophylaxis varied  
379 widely, with some older participants mentioning 20 or more shots (as was the case  
380 in the 1970s).

381 Belief that the full series (5 shots) could be harmful was cited as a reason to not  
382 adhere the complete series. Multiple respondents noted that "the whole dosage"  
383 could have adverse effects, and that other people say that receiving too many  
384 vaccines is dangerous:

385 *"I have heard that if you get all the vaccine doses, it harms people... That is why they*  
386 *don't want to be given the vaccines; other people tell them not to [get the full series]*  
387 *because it's harmful." (Woman, urban area).*

388 Participants reported others might stop PEP early if there is no evidence of  
389 symptoms and the wound is healed (from start to end of vaccination, it would be 4  
390 weeks). They compared completing PEP to completing antibiotics when one is ill:

391 many stop taking antibiotics when they feel better. One woman in the peri-urban  
392 area got all her vaccines when she was bitten, but admitted that if her leg had not  
393 looked so swollen, she would have stopped going after the first few vaccines:

394 *"I suppose the person tells the doctor 'But why should I have five vaccines if I've already*  
395 *had three? Besides, I don't feel anything, it doesn't hurt, doesn't itch, doesn't sting,*  
396 *nothing, I don't have anything, or don't have any discomfort'."*

397 Only peri-urban participants mentioned the quality of services at health  
398 facilities as a barrier to continuing PEP. Perceptions of mistreatment surfaced  
399 numerous times:

400 *Woman1: ...what am I going to go for? To be treated like that? I'd better not go, I'll just*  
401 *take care of myself.*

402 *Woman2: The same with me, they told me 'no, no, no, you go somewhere else to get*  
403 *attended'. (Peri-urban area)*

404 Suspicions about vaccine quality were also raised, but respondents could not offer  
405 further details.

406 In both areas, participants perceived a lack of information about the risks of  
407 discontinuing the PEP regimen, which in turn reduces motivation to make time for  
408 dog-bite related medical treatment; participants also referenced people's ignorance  
409 or carelessness in dealing with important issues.

410 *Man: [They don't continue their vaccines] because people work, they have their families.*  
411 *Facilitator: Even though they can die?*

412 *Woman: There are very ignorant people who don't even care what happens to their*  
413 *children and the rest of people, they just don't care. (Peri-urban area)*

414 In both areas, lack of time was cited as a likely reason for not seeking to  
415 complete one's vaccination series, specifically referring to people not wanting or  
416 not being able to take time off of work. In some parts of Arequipa, this argument  
417 might be unfounded since health workers actually go to the homes of people  
418 receiving PEP vaccination. Some women in the peri-urban area also mentioned that  
419 women might not go due to child care needs. Moreover, because the health posts  
420 that primarily service peri-urban communities may not offer vaccines, time spent  
421 seeking care at a health center is generally higher for those in peri-urban areas and  
422 participants complained about this.

#### 423 **4. Discussion**

424 An epidemic of canine rabies in Arequipa has received widespread attention, from  
425 radio and TV messages to posters at health facilities (Figures 2 and 3) and it is clear  
426 that some specific knowledge gaps persist. For example, most FGD participants  
427 correctly associated aggressive and salivating dogs with rabies, but none identified  
428 the paralytic form of the disease, which is similar to what others have found  
429 (12,13,26,32,33). It is important to increase awareness of this common (34) clinical  
430 manifestation of rabies that may increase human exposure to the virus but may be  
431 missed by the community and the health system. Most participants also knew that  
432 dogs could get rabies from other dog bites; however, many others thought dogs  
433 could get rabies from being kept on rooftops or other hot places, unattended, with

434 insufficient water, similar to what has been reported in Ethiopia (35). Some thought  
435 that flies can transmit rabies, similar to what was observed in Bali (36). Other  
436 reported misbeliefs such as the inhalation route (35) or any contact with dog saliva  
437 regardless of skin integrity (27,35), were not stated by our participants. It is very  
438 concerning that two participants in our study experienced a clearly risky scenario  
439 (i.e., dog behavior change, aggression towards members of the family, a bleeding  
440 bite), but killed and buried the dog and did not seek medical care or notify  
441 authorities. Other participants mentioned disposing of dead dogs in the same way  
442 without reporting them to health inspectors, suggesting lack of community  
443 awareness and engagement with the rabies surveillance system.

444 While these knowledge gaps may be partially responsible for poor  
445 prevention-related behaviors, there were additional behavioral drivers of failure to  
446 adhere to prevention guidelines among those who who could articulate the  
447 importance of seeking care and other recommended actions post-dog bite. Several  
448 participants displayed common mental shortcuts, cognitive biases, or other  
449 psychological factors that made it difficult to act on intentions to follow prevention  
450 guidance following a potential exposure. For example, some participants  
451 downplayed the risk of their own dog contracting rabies, even when acting  
452 atypically aggressive. This is likely due to some combination of optimism bias  
453 (37,38) myside bias (39), and halo effect (40), all of which will contribute to  
454 misperceptions about the relative risk of one's own dog – a familiar animal for  
455 whom on may have fond feelings – contracting rabies vs. a stray dog, and the  
456 assessment of one's own risk for contracting rabies from a familiar vs. a strange  
457 dog.

458 Other behavioral barriers to appropriate prevention are related to mental  
459 models (41) about rabies and prevention, some of which may be inadvertently  
460 supported by preventive promotional material and some of which come from  
461 long-standing folk wisdom. For example, the perception that one need not seek care  
462 for a superficial bite or scratch, or a bite from a seemingly-healthy dog, may have  
463 been influenced by posters at health facilities that show extremely  
464 aggressive-looking dogs foaming at the mouth, and images of severe, bloody bites  
465 on an arm. While the graphic quality of these images is attention-grabbing, it may  
466 have had the unintended consequence of anchoring people's perceptions of what a  
467 rabid dog is like and the severity of bites that require attention. Another very  
468 common bias—present biased-preferences or hyperbolic discounting (42) can  
469 explain how even minimal hassle factors drive nonadherence to PEP once  
470 recommended (43). Because we overweight immediate costs and benefits of a  
471 behavior, and heavily discount consequences that are probabilistic or in the future,  
472 the hassle and inconvenience of repeated trips to a crowded clinic can easily  
473 outweigh the perceived future health benefit of completing the series.

474 A third set of barriers to effective secondary prevention identified in our study  
475 is related to trust in and perceived quality of health services. Many participants had  
476 lost faith in the ability of their local health posts to attend to them. During an  
477 emergency as this one, all health facilities – *particularly* the small ones in the more

478 remote peri-urban areas – must be equipped and prepared to initiate and provide  
479 PEP to individuals who require it. Referring exposed individuals away means  
480 they may be delayed, or never, receive PEP. As an example, when the research team  
481 checked with healthcare providers at a nearby health care facility equipped with a  
482 refrigerator, in an area with several cases of verified canine rabies, they were told  
483 that, as a small facility, the health post did not have any human rabies vaccines and  
484 people should seek care at a larger health center that was a difficult (due to hilly  
485 terrain) 30-minute walk away.

486 Completing the course of PEP once prescribed also emerged as a gap in  
487 effective rabies prevention. Our health authority collaborators explained that they  
488 do reach out to individuals who have not completed a vaccination series, but  
489 sometimes individuals refuse to see them or pretend they are away. While this  
490 might be due to a knowledge gap about disease severity, or hassle factors, there  
491 may also be other behavioral biases at play: Direct experiences or anecdotes of  
492 previous mistreatment at health facilities may contribute to reactive devaluation  
493 (devaluing the ideas or proposals that come from an antagonist (44) of health  
494 professionals' recommendations. Information avoidance or "ostriching" (45) may  
495 also lead people to purposefully avoid or tune out upsetting information such as  
496 rabies disease risk or the demands of effective prevention.

497 Our results point to solutions that could close the rabies prevention gap for  
498 human populations living in canine rabies endemic areas. Using media  
499 appropriately is a proven strategy to increase health service utilization [40], and  
500 finding the best communication channels will allow targeting more effectively  
501 specific populations. Moreover, to improve knowledge, messages must be  
502 appropriate for the audience they are intended for, and piloted and tested to ensure  
503 comprehension. Health education messages need to be clear that any type of dog  
504 can get rabies—whether it is a stray dog or a loved and well-cared-for house  
505 dog—all it takes is one small wound. While seeking care for a "mere" scratch might  
506 feel silly, or like a waste of time, it is critical in the midst of an outbreak that public  
507 health messaging around rabies motivate individuals to seek care even if the bite  
508 seems superficial or trivial.

509 However, some of the problems identified appear to be driven by biases  
510 underlying both intentions and behaviors that are unrelated to knowledge. For  
511 example, most individuals have experienced a dog bite at some point and known  
512 others experiencing dog bites where "nothing happened" despite being bitten—and  
513 disregard (or choose to disregard) that the circumstances are different when there is  
514 a canine rabies epidemic in the city. Behavior change communication campaigns  
515 and program improvement efforts alike can incorporate awareness of these  
516 cognitive biases and design both messaging and health services to counter them.  
517 For example, default stocking of rabies vaccine at all health posts and "fast track"  
518 treatment for patients arriving following an exposure would reduce real and  
519 perceived hassle factors.

520 There are some important limitations to this qualitative study. We used  
521 purposive sampling and our participants were recruited during daytime hours;

522 hence, it is not a comprehensive report of the views of others in the community.  
523 However, by the 7th and 8th FGDs, there was a saturation of themes that emerged  
524 for the various topics of interest. Although our team took note of health promotion  
525 materials that were visible in the health facilities or community, our study did not  
526 examine all sources of health education (or possible sources of misconceptions) in  
527 Arequipa. Questions regarding possible reasons for lack of PEP vaccination  
528 completion were asked of community members, based on what they have heard  
529 and observed in their communities regarding the rabies vaccine, but not the  
530 patients who had not completed their PEP vaccination regime; including this group  
531 would have been ideal, but outside the scope of the design of this study.

## 532 **5. Conclusions**

533 Our study describes knowledge deficits and behavioral biases affecting  
534 preventive practices for rabies in the city of Arequipa, Peru. We identify health  
535 education topics that should be emphasized to improve rabies prevention, common  
536 misperceptions to be addressed by communication campaigns, as well as suggest  
537 possible behavioral biases that could be addressed programmatically. To close  
538 knowledge gaps, salient messaging is urgently needed on the following topics:  
539 rabies is fatal for humans and dogs and not treatable once the clinical signs and  
540 symptoms start; any dog bite, even a small one from a known and seemingly  
541 healthy dog, can transmit the rabies virus, therefore seeking medical care is  
542 necessary to assess one's risk after a dog bite; if PEP vaccination is indicated, it is  
543 because the person is at risk of rabies; and, rabies fatality can be prevented if PEP  
544 vaccination is started promptly and is completed. Health practitioners could play  
545 an important role in promoting trust in their patients and communicating how the  
546 benefits of PEP vaccination outweigh the small cost of trips to the health facility and  
547 tolerable pain caused by injections; they could also reduce the steps and hassle for  
548 patients to receive treatment; for example, health posts in peri-urban locations must  
549 stop referring patients to other health facilities when these health posts could be  
550 equipped to vaccinate and manage patients within their localities to increase  
551 likelihood of patients seeking and obtaining care. Analysis of the gaps in  
552 knowledge as well as the ingrained cognitive biases surrounding canine rabies and  
553 health posts in the Arequipa community suggests that targeted strategies by level of  
554 community urbanization may be beneficial in dissolving barriers to PEP during a  
555 rabies epidemic.

556 **Acknowledgments:** This work was supported by the Eunice Kennedy Shriver National Institute of Child  
557 Health and Human Development (grant number R01HD075869). We acknowledge the work of the members of  
558 the One Health Unit for their contribution to the implementation of this study, especially Lina Mollesaca and  
559 Carlos Condori.

560 **Author Contributions:** R.C.N., M.Z.L., A.M.B., and V.A.P.S. conceived and designed the experiments; J.Br.,  
561 R.C.N., V.A.P.S., and K.B.M. conducted focus groups; J.Br., C.A.N., K.B.M, and V.A.P.S. analyzed the data;  
562 M.Z.L., J.Br., and A.M.B. administered and supervised the study, V.B. contributed with resources including  
563 facilities; and R.C.N., J.Br., A.M.B., and V.A.P.S. wrote and reviewed the paper.

564 **Conflicts of Interest:** The authors declare no conflict of interest. The founding sponsors had no role in the  
565 design of the study; in the collection, analyses, or interpretation of data; in the writing of the manuscript, and in  
566 the decision to publish the results.  
567

## 568 **References**

- 569 1. Pan American Health Organization, World Health Organization. Epidemiological Alert. 2015 Dec  
570 1;:1–11.
- 571 2. Castillo-Neyra R, Brown J, Borrini K, Arevalo C, Levy MZ, Bittenheim A, et al. Barriers to dog rabies  
572 vaccination during an urban rabies outbreak: Qualitative findings from Arequipa, Peru. Recuenco S,  
573 editor. PLoS Negl Trop Dis. Public Library of Science; 2017 Mar;11(3):e0005460.
- 574 3. Dirección General de Salud de las Personas, Dirección de Atención Integral de Salud. Norma Técnica  
575 De Salud Para La Prevención Y Control De Rabia Humana En El Perú [Technical Health Norm for the  
576 Prevention and Control of Human Rabies in Peru]. 2006 p. 101.
- 577 4. Hemachudha T, Laothamatas J, Rupprecht CE. Human rabies: a disease of complex neuropathogenetic  
578 mechanisms and diagnostic challenges. Lancet Neurol. 2002 Jun;1(2):101–9.
- 579 5. Rupprecht CE, Hanlon CA, Hemachudha T. Rabies re-examined. Lancet Infect Dis. 2002  
580 Jun;2(6):327–43.
- 581 6. Kimberlin D, Brady M, Jackson M, Long S. 2015 Report of the Committee on Infectious Diseases. 30 ed.  
582 2015;:1–600.
- 583 7. Grill AK. Approach to management of suspected rabies exposures: what primary care physicians need  
584 to know. Can Fam Physician. College of Family Physicians of Canada; 2009 Mar;55(3):247–51.
- 585 8. Hampson K, Dobson A, Kaare M, Dushoff J, Magoto M, Sindoya E, et al. Rabies exposures,  
586 post-exposure prophylaxis and deaths in a region of endemic canine rabies. Kienny MP, editor. PLoS  
587 Negl Trop Dis. 2008;2(11):e339.
- 588 9. O'Brien KL, Nolan T, SAGE WG on Rabies. The WHO position on rabies immunization - 2018 updates.  
589 Vaccine. 2019 Oct 3;37 Suppl 1:A85–7.
- 590 10. de Salud M. Norma Técnica de Salud para la Vigilancia, Prevención y Control de la Rabia Humana en  
591 el Perú. Catalogación hecha por la Biblioteca del Ministerio de Salud. 2017 Oct pp. 1–101.
- 592 11. Mazigo HD, Okumu FO, Kweka EJ, Mnyone LL. Retrospective analysis of suspected rabies cases  
593 reported at bugando referral hospital, mwanza, Tanzania. J Glob Infect Dis. Medknow Publications;  
594 2010 Sep;2(3):216–20.
- 595 12. De Ramos MEM MD, Bravo LC MD. Knowledge, Attitudes And Practices Of The Community  
596 Regarding Animal Bites Rabies. PIDSP. 2004;8(1):1–9.
- 597 13. Digafé RT, Kifelew LG, Mechesso AF. Knowledge, attitudes and practices towards rabies:

- 598 questionnaire survey in rural household heads of Gondar Zuria District, Ethiopia. BMC Res Notes. 2nd  
599 ed. BioMed Central; 2015 Sep 2;8(1):400–7.
- 600 14. Chaudhuri S. Knowledge, attitude and practice about animal bite and rabies among victims attending  
601 a rural hospital in eastern India. Vol. 4, Global Journal Of Medicine and Public Health. 2015 Mar pp.  
602 1–6.
- 603 15. Mills E, Jadad AR, Ross C, Wilson K. Systematic review of qualitative studies exploring parental  
604 beliefs and attitudes toward childhood vaccination identifies common barriers to vaccination. J Clin  
605 Epidemiol. 2005 Nov;58(11):1081–8.
- 606 16. Yaqub O, Castle-Clarke S, Sevdalis N, Chataway J. Attitudes to vaccination: a critical review. Soc Sci  
607 Med. 2014 Jul;112:1–11.
- 608 17. Kabeta T, Deresa B, Tigre W, Ward MP, Mor SM. Knowledge, Attitudes and Practices of Animal Bite  
609 Victims Attending an Anti-rabies Health Center in Jimma Town, Ethiopia. Zinsstag J, editor. PLoS  
610 Negl Trop Dis. Public Library of Science; 2015;9(6):e0003867.
- 611 18. Wentworth D, Hampson K, Thumbi SM, Mwatondo A, Wambura G, Chng NR. A social justice  
612 perspective on access to human rabies vaccines. Vaccine. 2019 Oct 3;37 Suppl 1:A3–A5.
- 613 19. Hampson K, Dushoff J, Bingham J, Brückner G, Ali YH, Dobson A. Synchronous cycles of domestic  
614 dog rabies in sub-Saharan Africa and the impact of control efforts. Proc Natl Acad Sci USA. 2007 May  
615 1;104(18):7717–22.
- 616 20. Hampson K, Coudeville L, Lembo T, Sambo M, Kieffer A, Attlan M, et al. Estimating the global burden  
617 of endemic canine rabies. Carvalho MS, editor. PLoS Negl Trop Dis. Public Library of Science; 2015  
618 Apr;9(4):e0003709.
- 619 21. World Health Organization. WHO Expert Consultation on Rabies. Second report. World Health Organ  
620 Tech Rep Ser. 2013;(982):1–139–backcover.
- 621 22. Ichhpujani RL, Chhabra M, Mittal V, Bhattacharya D, Singh J, Lal S. Knowledge, attitude and practices  
622 about animal bites and rabies in general community--a multi-centric study. J Commun Dis. 2006  
623 Dec;38(4):355–61.
- 624 23. Agarvval N, Reddaiah VP. Knowledge, Attitude and Practice Following Dog Bite: A  
625 Community-Based Epidemiological Study. Perspectives and Issues. 2003;26(4):154–61.
- 626 24. Herbert M, Riyaz Basha S, Thangaraj S. Community perception regarding rabies prevention and stray  
627 dog control in urban slums in India. J Infect Public Health. 2012 Dec;5(6):374–80.
- 628 25. Tenzin, Dhand NK, Rai BD, Changlo, Tenzin S, Tsheten K, et al. Community-based study on  
629 knowledge, attitudes and perception of rabies in Gelephu, south-central Bhutan. Int Health. 2012  
630 Sep;4(3):210–9.
- 631 26. Lunney M, Fèvre SJS, Stiles E, Ly S, San S, Vong S. Knowledge, attitudes and practices of rabies

- 632 prevention and dog bite injuries in urban and peri-urban provinces in Cambodia, 2009. *Int Health*.  
633 2012 Mar;4(1):4–9.
- 634 27. Serebe SG, Tadesse KA, Yizengaw HA, Tamrat SM. Study on community knowledge, attitude and  
635 practice of rabies in and nearby Gondar town, North West Ethiopia. *JPHE*. 2014 Nov 21;6(12):429–35.
- 636 28. Matibag GC, Kamigaki T, Kumarasiri PVR, Wijewardana TG, Kalupahana AW, Dissanayake DRA, et  
637 al. Knowledge, attitudes, and practices survey of rabies in a community in Sri Lanka. *Environ Health*  
638 *Prev Med*. 2007 Mar;12(2):84–9.
- 639 29. Instituto de Estadística e Informática Perú. Estimaciones y Proyecciones de Población. Población total  
640 al 30 de junio del 2013, por grupos quinquenales de edad, según departamento, provincia y distrito.  
641 2006;:101. Available from: <https://www.inei.gov.pe/estadisticas/indice-tematico/poblacion-y-vivienda/>
- 642 30. Bernard HR. *Research Methods in Anthropology*. Rowman Altamira; 2006. 1 p.
- 643 31. Muhr T. *ATLAS.ti 6.0*. 6 ed. Scientific Software Development GmbH. Berlin, Germany; 2008.
- 644 32. Dzikwi AA, Ibrahim AS, Umoh JU. Knowledge, attitude and practice about rabies among children  
645 receiving formal and informal education in Samaru, Zaria, Nigeria. *Glob J Health Sci*. 2012 Aug  
646 9;4(5):132–9.
- 647 33. Haimbodi F, Mavenyengwa R, Noden BH. Knowledge and practices of residents in two north  
648 Namibian towns with regard to rabies and pet care. *Southern African Journal of Infectious Diseases*.  
649 2015 Jul 15;29(4):141–6.
- 650 34. Kasempimolporn S, Saengseesom W, Lumlertdacha B, Sitprijia V. Detection of rabies virus antigen in  
651 dog saliva using a latex agglutination test. *J Clin Microbiol. American Society for Microbiology (ASM)*;  
652 2000 Aug;38(8):3098–9.
- 653 35. Jemberu WT, Molla W, Almaw G, Alemu S. Incidence of rabies in humans and domestic animals and  
654 people's awareness in North Gondar Zone, Ethiopia. *Rupprecht CE, editor. PLoS Negl Trop Dis*.  
655 2013;7(5):e2216.
- 656 36. Widyastuti MDW, Bardosh KL, Sunandar, Basri C, Basuno E, Jatikusumah A, et al. On dogs, people,  
657 and a rabies epidemic: results from a sociocultural study in Bali, Indonesia. *Infect Dis Poverty. BioMed*  
658 *Central*; 2015;4(1):30–18.
- 659 37. Hanoch Y, Barnes A, Rice T. A Brief Overview of Behavioral Economics. In: Rice T, Hanoch Y, Barnes  
660 AJ, editors. *Behavioral Economics and Healthy Behaviors*. 1st ed. Routledge; 2017. pp. 14–29. (Key  
661 Concepts and Current Research).
- 662 38. Shepperd JA, Waters EA, Weinstein ND, Klein WMP. A Primer on Unrealistic Optimism. *Current*  
663 *Directions in Psychological Science*. SAGE PublicationsSage CA: Los Angeles, CA; 2015 Jun  
664 10;24(3):232–7.
- 665 39. Stanovich KE, West RF, Toplak ME. Myside Bias, Rational Thinking, and Intelligence. *Current*



- 666 Directions in Psychological Science. 4 ed. SAGE PublicationsSage CA: Los Angeles, CA; 2013 Aug  
667 5;22(4):259–64.
- 668 40. Hofflinger Á, Boso À, Oltra C. The Home Halo Effect: how Air Quality Perception is Influenced by  
669 Place Attachment. Hum Ecol. Springer US; 2019 Aug 7;47(4):589–600.
- 670 41. Austin LC, Fischhoff B. Injury prevention and risk communication: a mental models approach. Injury  
671 Prevention. BMJ Publishing Group Ltd; 2012 Apr 1;18(2):124–9.
- 672 42. White JS, Dow WH. Intertemporal Choices for Health. In: Behavioral Economics and Public Health.  
673 Oxford University Press; 2014. pp. 27–68.
- 674 43. Hallsworth M, Service O, Halpern D, Algate F. Four simple ways to apply behavioural insights.  
675 Behavioral Insights Ltd.
- 676 44. Ross L, Stillinger C. Barriers to Conflict Resolution. Negotiation Journal. John Wiley & Sons, Ltd  
677 (10.1111); 1991 Oct 1;7(4):389–404.
- 678 45. Golman R, Hagmann D, Loewenstein G. Information Avoidance. Journal of Economic Literature. 2017  
679 Mar 1;55(1):96–135.
- 680

# ¿Qué hacer si un perro te muerde?

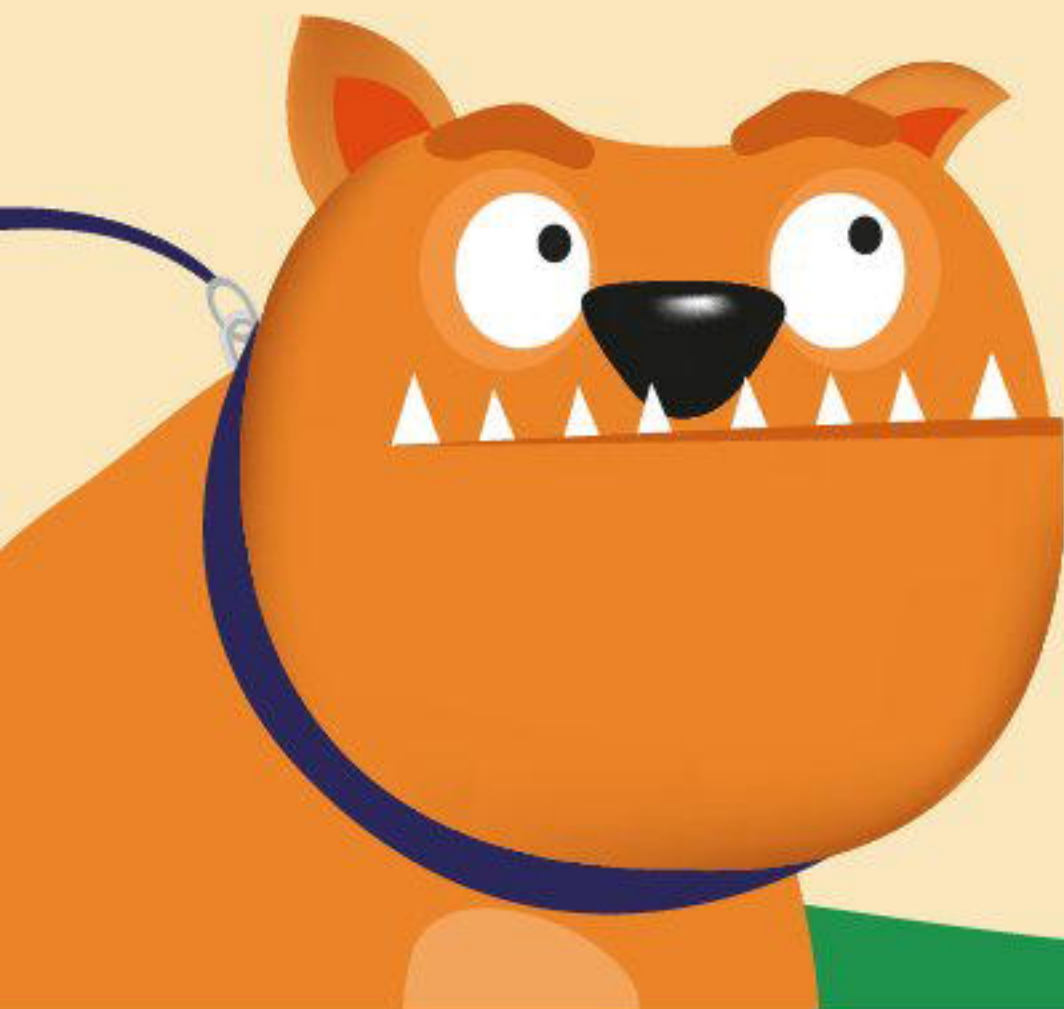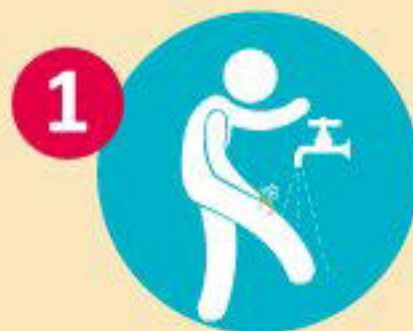

**Lávate** la herida con abundante agua y jabón

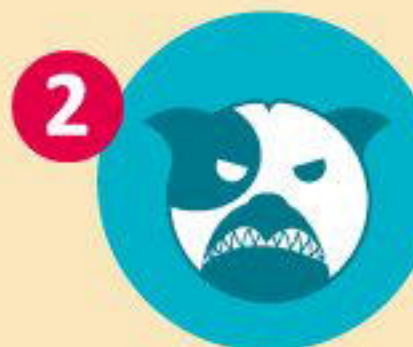

**Ubica** al animal mordedor

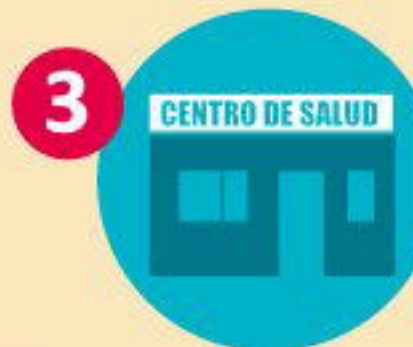

**Acude** de inmediato al establecimiento de salud

Para mayor información, llama gratis a INFOSALUD: ☎ 0800-10828

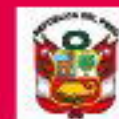

PERÚ

Ministerio  
de Salud

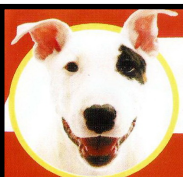

## ¿Qué es la Rabia?

La **RABIA** es una enfermedad que **MATA**. Afecta al hombre y a los animales como el perro.

## ¿Dónde se encuentra?

El virus se encuentra en la **SALIVA** de los perros con Rabia.

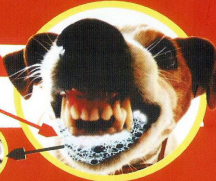

Virus de la Rabia

## ¿Cómo se transmite?

Se transmite a través de **MORDEDURA, RASGUÑO** o **CONTACTO** directo de mucosas o heridas con **SALIVA DEL ANIMAL CON RABIA**.

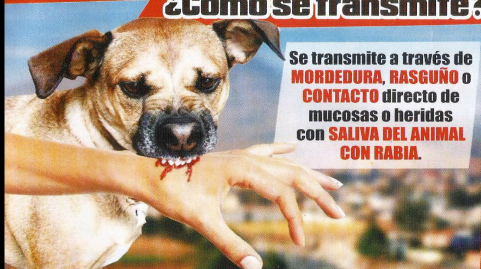

Si en los últimos **MESES HAS SIDO MORDIDO POR UN PERRO**, ¡CUIDADO puedes tener Rabia!!! **ACUDE INMEDIATAMENTE AL ESTABLECIMIENTO DE SALUD**

## ENCASO DE MORDEDURA:

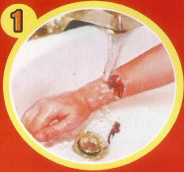

**1 LAVA** la herida con abundante agua y jabón.

**2 IDENTIFICA** al animal mordedor, para su observación.

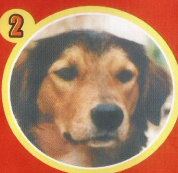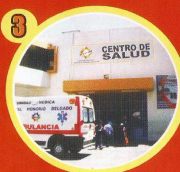

**3 ACUDE** al Establecimiento de Salud más cercano.

# ¿Cómo previenes la Rabia?

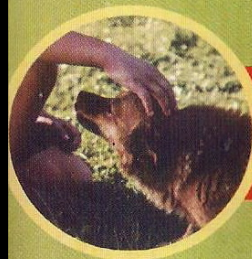

No acaricies perros desconocidos o callejeros, porque te pueden morder.

Si encuentras perros muertos o enfermos, avise al Personal de Salud o al Serenazgo de tu localidad.

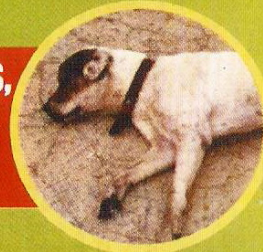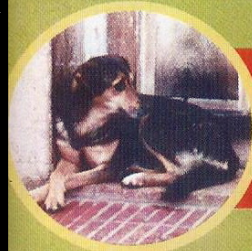

No críes a tu perro en la calle.

Vacuna a tu mascota todos los años contra la Rabia, en las campañas del Ministerio de Salud. **ES GRATUITO.**

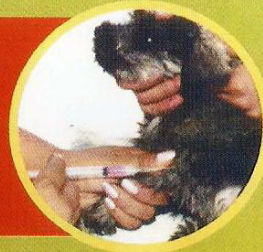

Si tu perro muerde, **¡NO LO MATES!!!** porque debe ser observado.

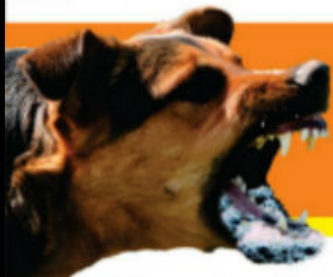

La **RABIA** es una enfermedad viral del sistema nervioso central. Se transmite a través de **MORDEDURA, RASGUÑOS** o **CONTACTO** directo de mucosas o heridas con **SALIVA DEL ANIMAL INFECTADO**.

## POR ESO SI ERES MORDIDO POR UN PERRO:

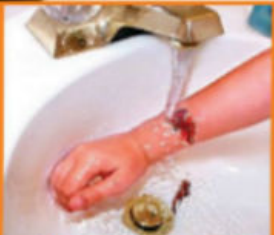

**1 LAVA** la herida con abundante agua y jabón.

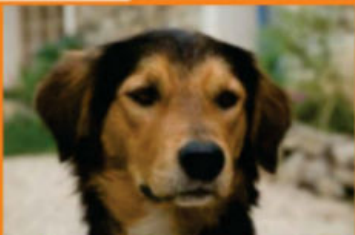

**2 IDENTIFICA** al animal mordedor.

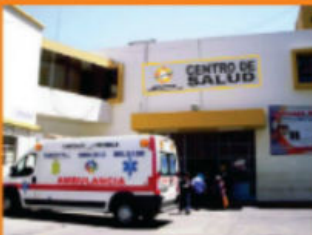

**3 ACUDE** al Establecimiento de Salud más cercano.

DESDE LOS 3 MESES, **VACÚNALO** TODOS LOS AÑOS CONTRA LA **RABIA**
